# Supplementary material for: Leveraging single-cell transcriptomic data to uncover immune suppressive cancer cell subsets in triple-negative canine breast cancers
Source: Front Vet Sci. 2024 Sep 23;11:1434617. doi: 10.3389/fvets.2024.1434617 (PMC11457229; doi:10.3389/fvets.2024.1434617)
Supplement: SUPPLEMENTARY TABLE S1 — A summary of subject characteristics. [file Table_1.XLSX]

## Sheet: Sheet1
Supplementary Table 1. Subject characteristics
Data accession number	Breed	Sex	Mean age (year-old)	Weight (kg)	Clinical and laboratory tests	Time of study conducted	Location of the study
GSE142184	Cocker spaniel (n=1)	ns	12.5 (12-13)	ns	ns	ns	France
GSE183300	German shepherd (n=2)	ns	na	ns	ns	ns	China
E-MTAB-9623	West Highland white terrier (n=8)	Males (n=3) and female (n=5)	9.5 (5.4-12.7)	9.0 (8.4-9.9)	History, normal physical examinatino, blood work, 6-min walked distance, thoracic high-resolution computed tomography, bronchoscopy, and analysis of bronchoalveolar fluid	March and October 2018	Belgium
E-MTAB-9265	Yorkshire terier (n=1), French bulldog (n=1), West Highland white terrier (n=1), Australian shepherd (n=1)	Female (n=4)	7.5 (4-11)	ns	History, normal physical examination, blood work (plasma biochemistry and hematology), bronchoscopy, and analysis of bronchoalveolar fluid	December 2017 and June 2018	Belgium
GSE144730	nd	Males (n=8) and female (n=2)	nd	ns	Standard clinical diagnostic procedures (serological testing, intradermal testing, food trials, patient history assessment and assessment of allergic signs)	ns	USA
GSE218355	Beagle	Male (n=3)	7.7 (7-9)	ns	Routine vaccinations (distemper, rabies, infectious hepatitis, parvovirus infection, parainfluenza, and leptospirosis)	ns	Germany
Abbreviations: not specified (ns), cannot be determined (nd)
