# Supplementary material for: Leveraging single-cell transcriptomic data to uncover immune suppressive cancer cell subsets in triple-negative canine breast cancers
Source: Front Vet Sci. 2024 Sep 23;11:1434617. doi: 10.3389/fvets.2024.1434617 (PMC11457229; doi:10.3389/fvets.2024.1434617)
Supplement: SUPPLEMENTARY TABLE S2 — A list of cluster markers defining TNBC subpopulations. [file Table_2.xlsx]

## Sheet: Supplementary table 2. TNBC clu
Cluster	Gene	P value	avg_log2FC	% of genes in the corresponding cluster	% of genes in other clusters	Adjusted P value
0	SFRP2	0	3.7823	0.92	0.321	0
0	TPM2	0	2.85261	0.975	0.519	0
0	COL3A1	0	2.60386	0.948	0.449	0
0	LOX	0	2.27712	0.973	0.804	0
0	STC2	0	2.20945	0.89	0.458	0
0	CALD1	0	2.07433	0.997	0.943	0
0	COL5A2	0	1.96798	0.983	0.925	0
0	FABP3	0	1.80613	0.851	0.287	0
0	CRABP2	6.78e-284	1.96604	0.923	0.604	2.45e-279
0	ACTA2	9.44e-281	3.00031	0.879	0.411	3.41e-276
0	AP1S2	7.37e-270	1.48217	0.982	0.731	2.66e-265
0	COL1A2	1.36e-252	1.76356	0.953	0.801	4.92e-248
0	ADM	7.61e-252	1.6436	0.838	0.362	2.75e-247
0	COL11A1	1.01e-251	1.56963	0.978	0.534	3.64e-247
0	THBS1	4.66e-238	2.00294	0.951	0.831	1.69e-233
0	MYLK	1.95e-221	1.83439	0.982	0.849	7.04e-217
0	MYL9	2.51e-206	1.57142	0.98	0.888	9.07e-202
0	CTGF	2.3e-189	1.75195	0.953	0.783	8.31e-185
0	S100A4	1.61e-175	1.86687	0.908	0.713	5.82e-171
0	ACTG2	4.41e-112	2.01035	0.426	0.127	1.59e-107
1	COL2A1	0	3.43002	0.889	0.264	0
1	ENSCAFG00000012963	0	3.38106	0.82	0.195	0
1	C2orf40	0	3.30774	0.981	0.327	0
1	HAPLN1	0	2.6745	0.989	0.394	0
1	CTSD	0	2.5232	1	0.933	0
1	B2M	0	2.48844	1	0.971	0
1	SCRG1	0	2.3677	0.88	0.097	0
1	MGST1	0	2.27543	0.973	0.52	0
1	ENSCAFG00000018746	0	1.99334	0.894	0.209	0
1	CD59	0	1.97378	0.996	0.82	0
1	TF.1	0	1.88143	0.772	0.125	0
1	TM4SF18	0	1.61836	0.849	0.125	0
1	EDIL3	1.26e-294	1.68817	0.96	0.401	4.54e-290
1	IFI6	2.42e-286	3.06347	0.879	0.315	8.74e-282
1	FXYD6	1.43e-276	1.94511	0.962	0.669	5.18e-272
1	CDO1	2.65e-256	1.74645	0.536	0.076	9.56e-252
1	CRYAB	1.16e-238	1.83058	0.995	0.809	4.19e-234
1	ENSCAFG00000028765	2.7e-231	1.80882	0.995	0.942	9.77e-227
1	MAL	2.89e-199	1.75671	0.831	0.426	1.04e-194
1	timp3	7.89e-144	1.60391	0.985	0.878	2.85e-139
2	SPP1	0	3.11671	0.999	0.496	0
2	C15orf48	0	2.20016	0.712	0.129	0
2	FAM3D	0	1.78478	0.841	0.17	0
2	KRT17	0	1.75175	0.728	0.133	0
2	TSTD1	0	1.71054	1	0.881	0
2	ENSCAFG00000007307	2.27e-288	1.85771	1	0.369	8.19e-284
2	ENSCAFG00000007154	8.64e-284	2.32452	1	0.412	3.12e-279
2	TF	1.23e-275	2.50911	0.999	0.778	4.45e-271
2	MMP9	1.4e-275	2.30302	0.687	0.148	5.06e-271
2	MMP13	6.25e-273	2.90389	0.759	0.193	2.26e-268
2	SDC1	2.42e-268	1.94806	0.999	0.748	8.74e-264
2	TSPAN8	7.36e-268	1.78478	0.982	0.403	2.66e-263
2	ckpi	5.33e-262	2.95724	0.996	0.709	1.93e-257
2	ANKRD1	6.86e-250	2.39628	0.75	0.199	2.48e-245
2	ENSCAFG00000031443	9.09e-237	1.77225	0.997	0.517	3.29e-232
2	S100A2	1.03e-233	2.05157	0.997	0.627	3.73e-229
2	ENSCAFG00000031706	1.41e-195	2.15425	0.987	0.86	5.11e-191
2	AREG	7.56e-183	1.63352	0.754	0.248	2.73e-178
2	WFDC2	2.51e-81	2.41094	0.402	0.13	9.09e-77
2	CCL2	8.14e-66	2.46278	0.423	0.169	2.94e-61
3	MEI4	3.36e-164	1.10362	1	0.967	1.21e-159
3	MRPL55	4.77e-160	1.16124	0.996	0.922	1.72e-155
3	ENSCAFG00000000567	1.06e-156	1.00586	1	0.988	3.82e-152
3	HMGA1	1.2e-155	1.68896	0.996	0.622	4.35e-151
3	ENSCAFG00000010890	3.11e-148	1.00039	0.998	0.973	1.12e-143
3	BMP7	2.73e-141	0.979018	0.87	0.335	9.87e-137
3	MRPL21	8.87e-140	0.929288	0.994	0.94	3.21e-135
3	RPL31	2.55e-139	1.03758	1	0.965	9.23e-135
3	AP1S3	1.12e-132	1.11357	0.961	0.434	4.05e-128
3	ENSCAFG00000033303	3.19e-130	0.96863	0.983	0.799	1.15e-125
3	GUK1	2.26e-129	0.948427	1	0.953	8.18e-125
3	KRT19	8.01e-125	1.34911	0.93	0.394	2.89e-120
3	SHARPIN	4.52e-124	0.932693	0.99	0.808	1.64e-119
3	ENSCAFG00000019472	1.2e-116	1.10179	1	0.989	4.34e-112
3	ESM1	8e-113	1.15762	0.996	0.469	2.89e-108
3	CCDC34	4.55e-108	0.972604	0.965	0.802	1.65e-103
3	S100A2	1.81e-101	1.13774	0.988	0.644	6.54e-97
3	ITGA3	8.92e-100	0.907495	0.975	0.714	3.22e-95
3	UBE2S	3.04e-75	0.953859	0.969	0.817	1.1e-70
3	MT1	2.68e-51	1.00643	0.996	0.815	9.69e-47
4	A16L	0	5.7576	0.863	0.178	0
4	A12L	0	5.69576	0.885	0.191	0
4	A2L	0	5.55696	0.885	0.195	0
4	F3L	0	5.16992	0.907	0.226	0
4	F5L	0	5.07702	0.928	0.238	0
4	G1L	0	5.04771	0.863	0.187	0
4	A6L	0	5.02947	0.87	0.181	0
4	A37R	1.08e-299	5.19719	0.946	0.308	3.92e-295
4	D12L	2.52e-299	5.26021	0.926	0.293	9.11e-295
4	A26L	5.31e-297	5.3466	0.889	0.25	1.92e-292
4	F13L	1.85e-290	5.07879	0.946	0.337	6.7e-286
4	A7L	5.68e-289	6.26672	0.898	0.277	2.05e-284
4	3707678	8.89e-288	5.73437	0.867	0.242	3.21e-283
4	J6R	1.25e-284	5.1118	0.948	0.358	4.51e-280
4	F12L	5.96e-284	5.4981	0.946	0.36	2.15e-279
4	D11L	1.8e-282	5.03699	0.959	0.389	6.5e-278
4	A3L	2.17e-280	5.37229	0.943	0.366	7.85e-276
4	D13L	1.46e-267	5.53604	0.891	0.304	5.29e-263
4	O1L	3.2e-258	5.09966	0.967	0.464	1.15e-253
4	A10L	8.2e-238	6.67889	0.915	0.406	2.97e-233
5	DBF4	1.48e-235	1.60626	0.991	0.507	5.36e-231
5	BMP7	5.01e-228	1.32752	0.972	0.327	1.81e-223
5	TOP2A	1.44e-219	1.84129	0.978	0.382	5.19e-215
5	CA2	7.72e-215	1.43745	0.871	0.215	2.79e-210
5	MRPL55	3.09e-210	1.49848	1	0.922	1.12e-205
5	GUK1	2.38e-200	1.33843	1	0.953	8.62e-196
5	HMGA1	2.41e-192	1.96785	0.998	0.624	8.7e-188
5	SHARPIN	1.72e-187	1.23714	0.998	0.808	6.2e-183
5	ATG101	2.28e-184	1.27597	0.996	0.85	8.24e-180
5	RPS19BP1	5.28e-182	1.20003	1	0.874	1.91e-177
5	CENPW	1.68e-177	1.26781	1	0.614	6.08e-173
5	UBE2S	2.66e-168	1.54906	1	0.814	9.63e-164
5	ESM1	7.04e-167	1.77372	0.993	0.472	2.54e-162
5	GEM	6.88e-166	1.1938	0.941	0.412	2.49e-161
5	PMEPA1	4.4e-158	1.42273	1	0.783	1.59e-153
5	ANLN	2.28e-152	1.47494	0.991	0.572	8.26e-148
5	RFC4	4.68e-150	1.17052	0.998	0.815	1.69e-145
5	CCDC34	1.64e-147	1.17117	0.991	0.8	5.92e-143
5	HAS2	1.55e-101	1.25367	0.978	0.486	5.6e-97
5	KRT14	3.82e-88	1.29649	0.88	0.422	1.38e-83
6	ITGA5	1.06e-187	1.95034	0.997	0.7	3.82e-183
6	COL1A1	2.82e-182	2.35058	0.995	0.479	1.02e-177
6	SERPINE1	1.47e-160	2.12131	1	0.832	5.3e-156
6	WNT5A	2.47e-160	1.80581	0.837	0.295	8.92e-156
6	DPP4	5.44e-149	1.46009	0.946	0.489	1.97e-144
6	GPNMB	1.31e-142	1.58627	0.967	0.508	4.72e-138
6	INHBA	2.46e-141	1.60477	0.949	0.47	8.9e-137
6	COL5A1	4.64e-137	1.88341	0.997	0.81	1.68e-132
6	PTX3	1.27e-134	1.69464	0.834	0.344	4.6e-130
6	IGFBP7	4.66e-131	1.85192	0.974	0.681	1.69e-126
6	COL1A2	7.01e-126	1.91077	1	0.818	2.53e-121
6	APOE	1.71e-123	2.44351	0.952	0.551	6.18e-119
6	PLAUR	2.71e-114	2.07517	0.969	0.572	9.79e-110
6	DKK1	4.87e-114	2.04967	0.809	0.333	1.76e-109
6	TIMP1	1.26e-108	2.45211	1	0.962	4.55e-104
6	CA2	7.59e-99	1.68513	0.699	0.239	2.74e-94
6	MT2A	1.01e-67	1.46869	1	0.96	3.67e-63
6	PTGS2	6.24e-65	1.71717	0.76	0.398	2.25e-60
6	CYP1B1	1.5e-60	1.51908	0.962	0.825	5.43e-56
6	LIF	1.98e-56	1.52034	0.827	0.549	7.15e-52
7	AREG	1.21e-141	1.78238	0.868	0.278	4.37e-137
7	DCK	1.52e-136	1.05741	0.979	0.456	5.5e-132
7	ENSCAFG00000038899	1.76e-136	1.11697	0.966	0.396	6.36e-132
7	EFHD1	2.76e-132	1.25192	0.942	0.397	9.98e-128
7	ENSCAFG00000019472	3.33e-130	1.49129	1	0.989	1.2e-125
7	TOP2A	5.65e-129	1.31072	0.975	0.399	2.04e-124
7	ENSCAFG00000019210	7.39e-124	1.10638	0.969	0.566	2.67e-119
7	HMGB2	2.18e-123	1.44738	0.997	0.662	7.89e-119
7	WNT7A	5.65e-117	1.16047	0.975	0.416	2.04e-112
7	ENSCAFG00000007307	1.01e-115	1.48926	0.979	0.418	3.66e-111
7	KRT80	1.16e-113	1.0923	0.966	0.428	4.19e-109
7	ENSCAFG00000031443	1.99e-110	1.60888	0.997	0.553	7.19e-106
7	SDC1	1.56e-107	1.35081	1	0.767	5.64e-103
7	SPP1	3.93e-106	1.13183	0.991	0.535	1.42e-101
7	CENPW	2.87e-103	1.07898	0.997	0.625	1.04e-98
7	ENSCAFG00000007154	1.01e-100	1.28773	0.994	0.457	3.63e-96
7	UPK1B	5.56e-100	1.07552	0.954	0.414	2.01e-95
7	MT1	1.26e-95	1.83962	0.997	0.821	4.56e-91
7	HAS2	8.38e-86	1.24952	0.994	0.499	3.03e-81
7	ENSCAFG00000009110	3.1e-75	1.156	0.917	0.503	1.12e-70
8	ENSCAFG00000007705	1.62e-240	1.90701	0.988	0.21	5.86e-236
8	KNL1	1.34e-207	1.80312	0.976	0.266	4.85e-203
8	ASPM	4.45e-199	2.13248	0.988	0.301	1.61e-194
8	CENPE	1.5e-187	1.9317	0.996	0.36	5.41e-183
8	KIF23	8.92e-187	1.63542	0.972	0.301	3.23e-182
8	NUF2	2.32e-184	1.78555	0.996	0.337	8.37e-180
8	ENSCAFG00000030486	1.63e-167	1.82277	0.945	0.27	5.9e-163
8	KIF20B	3.94e-164	1.69042	0.996	0.453	1.42e-159
8	CDC20	3.81e-162	2.10835	0.988	0.409	1.38e-157
8	TPX2	8.77e-161	1.61893	0.996	0.396	3.17e-156
8	STMN1	8.42e-146	2.56071	0.992	0.553	3.04e-141
8	ENSCAFG00000017264	1.56e-142	2.00228	1	0.528	5.64e-138
8	SMC4	1.37e-134	1.83468	0.992	0.67	4.95e-130
8	DUT	4.45e-134	1.67467	0.996	0.766	1.61e-129
8	ENSCAFG00000008640	8.73e-118	1.82371	1	0.953	3.15e-113
8	TUBB4B	4.08e-112	1.77708	0.98	0.682	1.47e-107
8	UBE2S	4.34e-106	1.59612	1	0.822	1.57e-101
8	GNG2	1.19e-85	1.61137	0.96	0.45	4.32e-81
8	UBE2C	6.08e-75	1.70039	0.759	0.325	2.2e-70
8	HMGB2	5.43e-59	1.75428	0.889	0.673	1.96e-54
9	SMC2	8.86e-119	1.36635	0.981	0.395	3.2e-114
9	ENSCAFG00000030087	1.18e-105	1.693	1	0.576	4.26e-101
9	TK1	1.19e-103	1.6014	0.986	0.558	4.31e-99
9	MCM6	2.11e-100	1.38001	0.99	0.698	7.62e-96
9	STMN1	1.49e-99	1.86004	0.995	0.557	5.37e-95
9	SRSF7	8.92e-90	1.31068	0.995	0.836	3.23e-85
9	SMC4	3.31e-88	1.28308	0.995	0.673	1.2e-83
9	DIAPH3	1.03e-87	1.16462	0.957	0.472	3.71e-83
9	HMGB2	1.94e-87	1.64244	0.99	0.671	7.01e-83
9	SMC3	1.02e-85	1.09907	0.976	0.743	3.68e-81
9	PTMA	1.24e-82	1.40779	1	0.908	4.47e-78
9	MYBL1	2.61e-80	1.1664	0.976	0.549	9.45e-76
9	ENSCAFG00000013366	3.71e-76	1.12538	1	0.925	1.34e-71
9	ENSCAFG00000030810	1.07e-70	1.0688	1	0.876	3.85e-66
9	DUT	8.38e-69	1.14277	0.986	0.769	3.03e-64
9	HAPLN1	5.16e-65	1.61845	0.971	0.458	1.86e-60
9	ENSCAFG00000014968	1.06e-61	1.0711	0.995	0.821	3.85e-57
9	ENSCAFG00000008640	1.97e-59	1.08788	1	0.954	7.12e-55
9	C2orf40	1.72e-48	1.22356	0.894	0.401	6.23e-44
9	CKB	1.66e-46	1.07585	0.981	0.784	5.99e-42
10	PCP4	3.59e-306	3.84067	0.982	0.029	1.3e-301
10	WFDC2	9.23e-74	2.81946	0.947	0.158	3.34e-69
10	ALDH1A3	7.48e-56	3.4543	1	0.3	2.7e-51
10	DSC2	2.4e-55	2.67341	1	0.285	8.69e-51
10	MALL	1.51e-54	2.42005	1	0.297	5.45e-50
10	CAT	1.01e-53	2.32763	1	0.309	3.65e-49
10	ATP1B1	4.21e-38	3.19104	1	0.872	1.52e-33
10	PERP	8.7e-38	2.50506	1	0.76	3.15e-33
10	DPY19L3	1.78e-36	2.10849	0.982	0.539	6.45e-32
10	CST6	5.88e-36	3.15944	1	0.91	2.13e-31
10	S100A8	5.26e-35	2.64827	0.895	0.27	1.9e-30
10	SAT1	5.64e-35	2.88471	1	0.783	2.04e-30
10	ANXA1	7.98e-33	2.34777	1	0.977	2.89e-28
10	MGST1	4.74e-32	2.29859	1	0.581	1.71e-27
10	ENSCAFG00000031706	1e-29	2.25144	1	0.876	3.62e-25
10	EMP1	1.39e-29	2.19177	1	0.88	5.04e-25
10	TXN	1.66e-29	2.15597	1	0.937	6.01e-25
10	MGAT4B	1.19e-28	2.05672	0.982	0.814	4.31e-24
10	ckpi	1.03e-24	2.49903	1	0.745	3.72e-20
10	KRT14	4.06e-19	2.09347	0.912	0.458	1.47e-14
