# Supplementary material for: Leveraging single-cell transcriptomic data to uncover immune suppressive cancer cell subsets in triple-negative canine breast cancers
Source: Front Vet Sci. 2024 Sep 23;11:1434617. doi: 10.3389/fvets.2024.1434617 (PMC11457229; doi:10.3389/fvets.2024.1434617)
Supplement: SUPPLEMENTARY TABLE S3 — A list of DEGs defining immune suppressive TNBC subsets and their enrichment gene sets. [file Table_3.xlsx]

## Sheet: Sheet2
Clusters	Genes	p_val	avg_log2FC	% of genes expressed in the TNBC infected (%)	% of genes expressed in the TNBC (%)	p_val_adj	Gene sets that include the corresponding gene
2	SERPINE1	1.62265e-12	0.739268	0.975	0.9	5.86475e-08	TGF beta, TNF alpha
2	HSD11B1	7.11557e-13	0.424182	0.803	0.562	2.57178e-08	Exh
2	MSC	5.50581e-05	0.40532	0.8	0.681	1	TNF alpha
2	TRIB1	1.03814e-14	-0.401786	0.682	0.863	3.75214e-10	TNF alpha
2	SLC20A1	5.64589e-13	-0.40264	0.997	0.997	2.04059e-08	TGF beta
2	ST13	1.94164e-21	-0.415884	0.977	0.997	7.01767e-17	Exh
2	DBI	5.84829e-10	-0.42447	1	1	2.11375e-05	Exh
2	CCL2	0.000993133	-0.520066	0.369	0.48	1	TNF alpha, IL18
2	GEM	6.43062e-15	-0.576111	0.513	0.723	2.32422e-10	TNF alpha
2	HSPB1	8.91384e-20	-0.600394	1	1	3.22173e-15	IL18
2	FOS	3.66653e-26	-0.719785	0.583	0.827	1.32519e-21	TNF alpha, IL18
3	LIF	4.1671e-08	0.681609	0.887	0.699	0.00150612	TNF alpha
3	HADH	3.90161e-18	-0.379537	0.611	0.819	1.41016e-13	IL18
3	EIF1	2.29348e-12	-0.388837	1	1	8.28931e-08	TNF alpha
3	HDGF	1.65972e-12	-0.403209	0.837	0.907	5.99873e-08	IL18
3	HSPB1	1.98241e-11	-0.487886	0.984	1	7.16503e-07	IL18
3	THBS1	3.05698e-05	-0.489704	0.891	0.889	1	TGF beta
3	ST13	3.98153e-21	-0.490001	0.992	0.991	1.43904e-16	Exh
3	MYC	4.98508e-13	-0.521428	0.813	0.912	1.80176e-08	TNF alpha
3	SLC20A1	1.67606e-14	-0.527918	0.981	0.982	6.05778e-10	TGF beta
3	LGALS3	3.03391e-11	-0.583906	1	1	1.09655e-06	Anti-inflammatory
5	LIF	9.09264e-23	1.16489	0.955	0.742	3.28635e-18	TNF alpha
5	MSC	1.76426e-16	0.804919	0.845	0.586	6.37655e-12	TNF alpha
5	PTGS2	1.32239e-10	0.588497	0.858	0.603	4.77953e-06	Anti-inflammatory, TNF alpha, IL18
5	TF	1.01263e-05	0.576237	1	0.993	0.365996	IL18
5	VEGFA	9.03265e-10	0.553873	0.852	0.662	3.26467e-05	M2 macrophage, Anti-inflammatory, Anergy, TNF alpha, IL18
5	JAG1	1.16221e-10	0.489361	1	0.993	4.20056e-06	TNF alpha
5	BCAR3	2.62241e-11	0.376092	0.935	0.858	9.47819e-07	TGF beta
5	ETS1	1.9316e-12	0.37479	0.955	0.874	6.98138e-08	Exh
5	HADH	7.52239e-19	-0.401862	0.781	0.937	2.71882e-14	IL18
5	COL1A2	0.00467826	-0.41528	0.981	0.98	1	IL18
5	CLDN1	0.000907263	-0.441324	0.716	0.785	1	IL18
5	ST13	1.41999e-19	-0.492244	1	0.993	5.13227e-15	Exh
6	LIF	1.41641e-06	0.753707	0.901	0.762	0.0511933	TNF alpha
6	PTGS2	0.00260692	0.516633	0.841	0.69	1	Anti-inflammatory, TNF alpha, IL18
6	SAT1	0.0337285	0.512877	0.989	0.948	1	TNF alpha
6	VEGFA	8.43367e-07	0.3856	0.962	0.862	0.0304818	M2 macrophage, Anti-inflammatory, Anergy, TNF alpha, IL18
6	GADD45B	3.10494e-06	0.383931	0.94	0.905	0.112222	TNF alpha
6	CTNNB1	2.30929e-05	-0.372253	1	1	0.834646	TGF beta, IL18
6	SLC20A1	1.72406e-05	-0.37502	1	1	0.623127	TGF beta
6	CCND1	0.000781938	-0.382851	0.791	0.829	1	TNF alpha
6	EIF1	1.22715e-10	-0.395214	1	1	4.4353e-06	TNF alpha
6	EIF3B	1.04087e-09	-0.404793	0.89	0.952	3.76201e-05	Exh
6	ICAM1	1.14884e-05	-0.434538	0.907	0.914	0.415224	TNF alpha, IL18
6	PTX3	0.00881745	-0.463082	0.824	0.843	1	TNF alpha, IL18
6	GEM	2.80382e-05	-0.478257	0.692	0.771	1	TNF alpha
6	FN1	1.0476e-06	-0.490808	1	1	0.0378634	M2 macrophage, Anergy, IL18
6	TIMP1	0.000879936	-0.494894	1	1	1	IL18
6	PLAUR	0.000906973	-0.519857	0.962	0.976	1	TNF alpha
6	ACTA2	0.000260133	-0.553618	0.527	0.662	1	IL18
6	CCL2	0.00413441	-0.634136	0.269	0.381	1	TNF alpha, IL18
6	THBS1	2.01524e-09	-0.74678	0.813	0.881	7.2837e-05	TGF beta
7	JAG1	2.49624e-15	0.848133	1	1	9.02215e-11	TNF alpha
7	LIF	4.2543e-09	0.835076	0.943	0.749	0.000153763	TNF alpha
7	PLAU	1.37297e-07	0.717627	0.977	0.975	0.00496234	TNF alpha
7	MSC	3.42297e-05	0.707887	0.69	0.523	1	TNF alpha
7	ETS1	8.8124e-19	0.695192	0.954	0.841	3.18506e-14	Exh
7	SERPINE1	1.52109e-06	0.614988	0.966	0.925	0.0549766	TGF beta, TNF alpha
7	TF	3.96053e-07	0.584509	1	1	0.0143146	IL18
7	SAT1	0.0210835	0.549021	0.943	0.941	1	TNF alpha
7	VEGFA	4.09252e-06	0.459243	0.736	0.544	0.147916	M2 macrophage, Anti-inflammatory, Anergy, TNF alpha, IL18
7	PLAUR	0.000187657	0.457327	0.862	0.812	1	TNF alpha
7	THBS1	0.000425399	0.44895	0.897	0.849	1	TGF beta
7	SLC4A7	1.1098e-07	0.415106	0.977	0.933	0.00401114	IL18
7	CSF2	0.0230344	0.361003	0.575	0.418	1	Anti-inflammatory, TNF alpha
7	HSPB1	8.83847e-06	-0.361648	1	1	0.319449	IL18
7	FOS	3.40814e-08	-0.547205	0.494	0.766	0.00123181	TNF alpha, IL18

## Sheet: Sheet1
Clusters	Genes	p_val	avg_log2FC	TNBC infected (%)	TNBC (%)	p_val_adj	Gene sets
2	SERPINE1	1.62265e-12	0.739268	0.975	0.9	5.86475e-08	TGF beta
2	SERPINE1	1.62265e-12	0.739268	0.975	0.9	5.86475e-08	TNF alpha
2	HSD11B1	7.11557e-13	0.424182	0.803	0.562	2.57178e-08	Exh
2	MSC	5.50581e-05	0.40532	0.8	0.681	1	TNF alpha
2	TRIB1	1.03814e-14	-0.401786	0.682	0.863	3.75214e-10	TNF alpha
2	SLC20A1	5.64589e-13	-0.40264	0.997	0.997	2.04059e-08	TGF beta
2	ST13	1.94164e-21	-0.415884	0.977	0.997	7.01767e-17	Exh
2	DBI	5.84829e-10	-0.42447	1	1	2.11375e-05	Exh
2	CCL2	0.000993133	-0.520066	0.369	0.48	1	TNF alpha
2	CCL2	0.000993133	-0.520066	0.369	0.48	1	IL18
2	GEM	6.43062e-15	-0.576111	0.513	0.723	2.32422e-10	TNF alpha
2	HSPB1	8.91384e-20	-0.600394	1	1	3.22173e-15	IL18
2	FOS	3.66653e-26	-0.719785	0.583	0.827	1.32519e-21	TNF alpha
2	FOS	3.66653e-26	-0.719785	0.583	0.827	1.32519e-21	IL18
3	LIF	4.1671e-08	0.681609	0.887	0.699	0.00150612	TNF alpha
3	HADH	3.90161e-18	-0.379537	0.611	0.819	1.41016e-13	IL18
3	EIF1	2.29348e-12	-0.388837	1	1	8.28931e-08	TNF alpha
3	HDGF	1.65972e-12	-0.403209	0.837	0.907	5.99873e-08	IL18
3	HSPB1	1.98241e-11	-0.487886	0.984	1	7.16503e-07	IL18
3	THBS1	3.05698e-05	-0.489704	0.891	0.889	1	TGF beta
3	ST13	3.98153e-21	-0.490001	0.992	0.991	1.43904e-16	Exh
3	MYC	4.98508e-13	-0.521428	0.813	0.912	1.80176e-08	TNF alpha
3	SLC20A1	1.67606e-14	-0.527918	0.981	0.982	6.05778e-10	TGF beta
3	LGALS3	3.03391e-11	-0.583906	1	1	1.09655e-06	Anti-inflammatory
5	LIF	9.09264e-23	1.16489	0.955	0.742	3.28635e-18	TNF alpha
5	MSC	1.76426e-16	0.804919	0.845	0.586	6.37655e-12	TNF alpha
5	PTGS2	1.32239e-10	0.588497	0.858	0.603	4.77953e-06	Anti-inflammatory
5	PTGS2	1.32239e-10	0.588497	0.858	0.603	4.77953e-06	TNF alpha
5	PTGS2	1.32239e-10	0.588497	0.858	0.603	4.77953e-06	IL18
5	TF	1.01263e-05	0.576237	1	0.993	0.365996	IL18
5	VEGFA	9.03265e-10	0.553873	0.852	0.662	3.26467e-05	M2
5	VEGFA	9.03265e-10	0.553873	0.852	0.662	3.26467e-05	Anti-inflammatory
5	VEGFA	9.03265e-10	0.553873	0.852	0.662	3.26467e-05	Anergy
5	VEGFA	9.03265e-10	0.553873	0.852	0.662	3.26467e-05	TNF alpha
5	VEGFA	9.03265e-10	0.553873	0.852	0.662	3.26467e-05	IL18
5	JAG1	1.16221e-10	0.489361	1	0.993	4.20056e-06	TNF alpha
5	BCAR3	2.62241e-11	0.376092	0.935	0.858	9.47819e-07	TGF beta
5	ETS1	1.9316e-12	0.37479	0.955	0.874	6.98138e-08	Exh
5	HADH	7.52239e-19	-0.401862	0.781	0.937	2.71882e-14	IL18
5	COL1A2	0.00467826	-0.41528	0.981	0.98	1	IL18
5	CLDN1	0.000907263	-0.441324	0.716	0.785	1	IL18
5	ST13	1.41999e-19	-0.492244	1	0.993	5.13227e-15	Exh
6	LIF	1.41641e-06	0.753707	0.901	0.762	0.0511933	TNF alpha
6	PTGS2	0.00260692	0.516633	0.841	0.69	1	Anti-inflammatory
6	PTGS2	0.00260692	0.516633	0.841	0.69	1	TNF alpha
6	PTGS2	0.00260692	0.516633	0.841	0.69	1	IL18
6	SAT1	0.0337285	0.512877	0.989	0.948	1	TNF alpha
6	VEGFA	8.43367e-07	0.3856	0.962	0.862	0.0304818	M2
6	VEGFA	8.43367e-07	0.3856	0.962	0.862	0.0304818	Anti-inflammatory
6	VEGFA	8.43367e-07	0.3856	0.962	0.862	0.0304818	Anergy
6	VEGFA	8.43367e-07	0.3856	0.962	0.862	0.0304818	TNF alpha
6	VEGFA	8.43367e-07	0.3856	0.962	0.862	0.0304818	IL18
6	GADD45B	3.10494e-06	0.383931	0.94	0.905	0.112222	TNF alpha
6	CTNNB1	2.30929e-05	-0.372253	1	1	0.834646	TGF beta
6	CTNNB1	2.30929e-05	-0.372253	1	1	0.834646	IL18
6	SLC20A1	1.72406e-05	-0.37502	1	1	0.623127	TGF beta
6	CCND1	0.000781938	-0.382851	0.791	0.829	1	TNF alpha
6	EIF1	1.22715e-10	-0.395214	1	1	4.4353e-06	TNF alpha
6	EIF3B	1.04087e-09	-0.404793	0.89	0.952	3.76201e-05	Exh
6	ICAM1	1.14884e-05	-0.434538	0.907	0.914	0.415224	TNF alpha
6	ICAM1	1.14884e-05	-0.434538	0.907	0.914	0.415224	IL18
6	PTX3	0.00881745	-0.463082	0.824	0.843	1	TNF alpha
6	PTX3	0.00881745	-0.463082	0.824	0.843	1	IL18
6	GEM	2.80382e-05	-0.478257	0.692	0.771	1	TNF alpha
6	FN1	1.0476e-06	-0.490808	1	1	0.0378634	M2
6	FN1	1.0476e-06	-0.490808	1	1	0.0378634	Anergy
6	FN1	1.0476e-06	-0.490808	1	1	0.0378634	IL18
6	TIMP1	0.000879936	-0.494894	1	1	1	IL18
6	PLAUR	0.000906973	-0.519857	0.962	0.976	1	TNF alpha
6	ACTA2	0.000260133	-0.553618	0.527	0.662	1	IL18
6	CCL2	0.00413441	-0.634136	0.269	0.381	1	TNF alpha
6	CCL2	0.00413441	-0.634136	0.269	0.381	1	IL18
6	THBS1	2.01524e-09	-0.74678	0.813	0.881	7.2837e-05	TGF beta
7	JAG1	2.49624e-15	0.848133	1	1	9.02215e-11	TNF alpha
7	LIF	4.2543e-09	0.835076	0.943	0.749	0.000153763	TNF alpha
7	PLAU	1.37297e-07	0.717627	0.977	0.975	0.00496234	TNF alpha
7	MSC	3.42297e-05	0.707887	0.69	0.523	1	TNF alpha
7	ETS1	8.8124e-19	0.695192	0.954	0.841	3.18506e-14	Exh
7	SERPINE1	1.52109e-06	0.614988	0.966	0.925	0.0549766	TGF beta
7	SERPINE1	1.52109e-06	0.614988	0.966	0.925	0.0549766	TNF alpha
7	TF	3.96053e-07	0.584509	1	1	0.0143146	IL18
7	SAT1	0.0210835	0.549021	0.943	0.941	1	TNF alpha
7	VEGFA	4.09252e-06	0.459243	0.736	0.544	0.147916	M2
7	VEGFA	4.09252e-06	0.459243	0.736	0.544	0.147916	Anti-inflammatory
7	VEGFA	4.09252e-06	0.459243	0.736	0.544	0.147916	Anergy
7	VEGFA	4.09252e-06	0.459243	0.736	0.544	0.147916	TNF alpha
7	VEGFA	4.09252e-06	0.459243	0.736	0.544	0.147916	IL18
7	PLAUR	0.000187657	0.457327	0.862	0.812	1	TNF alpha
7	THBS1	0.000425399	0.44895	0.897	0.849	1	TGF beta
7	SLC4A7	1.1098e-07	0.415106	0.977	0.933	0.00401114	IL18
7	CSF2	0.0230344	0.361003	0.575	0.418	1
7	CSF2	0.0230344	0.361003	0.575	0.418	1	TNF alpha
7	HSPB1	8.83847e-06	-0.361648	1	1	0.319449	IL18
7	FOS	3.40814e-08	-0.547205	0.494	0.766	0.00123181	TNF alpha
7	FOS	3.40814e-08	-0.547205	0.494	0.766	0.00123181	IL18
7	CCL2	0.00202437	-1.08171	0.161	0.343	1	TNF alpha
7	CCL2	0.00202437	-1.08171	0.161	0.343	1	IL18
