# Supplementary material for: Leveraging single-cell transcriptomic data to uncover immune suppressive cancer cell subsets in triple-negative canine breast cancers
Source: Front Vet Sci. 2024 Sep 23;11:1434617. doi: 10.3389/fvets.2024.1434617 (PMC11457229; doi:10.3389/fvets.2024.1434617)
Supplement: SUPPLEMENTARY TABLE S4 — A list of GO biological processes using DEGs that are listed in the Supplementary Table S3. [file Table_4.XLSX]

## Sheet: Supplementary table 4_Biologica
Gene ontology biological process	Fold enrichment	P value	FDR
positive chemotaxis (GO:0050918)	> 100	5.82e-08	0.000129
cell-substrate junction assembly (GO:0007044)	> 100	0.000165	0.00916
positive regulation of cell cycle G1/S phase transition (GO:1902808)	> 100	0.000212	0.0109
macrophage chemotaxis (GO:0048246)	> 100	0.000212	0.0107
negative regulation of angiogenesis (GO:0016525)	> 100	0.000264	0.0125
positive regulation of calcium ion transport (GO:0051928)	89.99	0.000323	0.014
regulation of angiogenesis (GO:0045765)	77.13	3.98e-07	0.000441
regulation of vasculature development (GO:1901342)	77.13	3.98e-07	0.000294
negative regulation of extrinsic apoptotic signaling pathway (GO:2001237)	73.63	0.000456	0.0188
positive regulation of epithelial cell proliferation (GO:0050679)	67.49	0.000531	0.0207
sprouting angiogenesis (GO:0002040)	67.49	0.000531	0.0203
positive regulation of mitotic cell cycle (GO:0045931)	67.49	0.000531	0.02
endothelial cell proliferation (GO:0001935)	62.3	0.000612	0.0209
negative regulation of protein catabolic process (GO:0042177)	57.85	0.000698	0.0218
response to heat (GO:0009408)	53.99	0.00079	0.0244
positive regulation of leukocyte chemotaxis (GO:0002690)	53.99	0.00079	0.024
regulation of extrinsic apoptotic signaling pathway (GO:2001236)	53.99	0.00079	0.0237
regulation of G1/S transition of mitotic cell cycle (GO:2000045)	53.99	0.00079	0.0234
response to hypoxia (GO:0001666)	50.62	0.000888	0.0259
regulation of cell cycle G1/S phase transition (GO:1902806)	50.62	0.000888	0.0256
response to decreased oxygen levels (GO:0036293)	50.62	0.000888	0.0253
zymogen activation (GO:0031638)	50.62	0.000888	0.0249
positive regulation of ion transport (GO:0043270)	47.64	0.00099	0.0259
epithelial cell proliferation (GO:0050673)	47.64	0.00099	0.0256
positive regulation of chemotaxis (GO:0050921)	47.64	0.00099	0.0253
membrane protein ectodomain proteolysis (GO:0006509)	44.99	0.0011	0.0277
positive regulation of leukocyte migration (GO:0002687)	40.49	0.00133	0.0332
response to oxygen levels (GO:0070482)	36.81	0.00159	0.0375
leukocyte chemotaxis (GO:0030595)	36.16	3.98e-07	0.000221
regulation of leukocyte migration (GO:0002685)	35.21	0.00172	0.0394
negative regulation of apoptotic signaling pathway (GO:2001234)	35.21	0.00172	0.039
response to temperature stimulus (GO:0009266)	35.21	0.00172	0.0386
myeloid leukocyte migration (GO:0097529)	34.91	4.68e-07	0.000208
membrane protein proteolysis (GO:0033619)	33.75	0.00186	0.0413
regulation of endocytosis (GO:0030100)	32.4	0.00201	0.0437
positive regulation of cell cycle process (GO:0090068)	31.15	0.00216	0.0465
regulation of calcium ion transport (GO:0051924)	31.15	0.00216	0.0461
cell chemotaxis (GO:0060326)	29.78	9.82e-07	0.000311
angiogenesis (GO:0001525)	29.45	1.34e-05	0.00213
mononuclear cell migration (GO:0071674)	28.25	0.000198	0.0107
neutrophil migration (GO:1990266)	27.61	0.000212	0.0112
leukocyte migration (GO:0050900)	27	1.55e-06	0.00043
granulocyte chemotaxis (GO:0071621)	26.41	0.00024	0.0116
blood vessel morphogenesis (GO:0048514)	26.13	2.1e-05	0.00275
blood vessel development (GO:0001568)	25.71	2.23e-05	0.00275
vasculature development (GO:0001944)	24.54	2.66e-05	0.00295
negative regulation of endopeptidase activity (GO:0010951)	24.3	0.000302	0.0137
tube morphogenesis (GO:0035239)	24.18	2.81e-05	0.00297
granulocyte migration (GO:0097530)	23.82	0.00032	0.0142
negative regulation of peptidase activity (GO:0010466)	23.36	0.000338	0.0144
tube development (GO:0035295)	21.89	4.07e-05	0.00377
negative regulation of proteolysis (GO:0045861)	21.69	0.000415	0.0174
circulatory system development (GO:0072359)	19.75	7.45e-07	0.000276
regulation of protein catabolic process (GO:0042176)	19.59	0.000552	0.0204
negative regulation of hydrolase activity (GO:0051346)	19.59	0.000552	0.0201
regulation of protein serine/threonine kinase activity (GO:0071900)	18.98	0.000604	0.0213
response to abiotic stimulus (GO:0009628)	18.83	7.14e-05	0.00528
positive regulation of cell population proliferation (GO:0008284)	17.42	9.56e-05	0.00624
regulation of endopeptidase activity (GO:0052548)	16.42	0.000906	0.0251
regulation of peptidase activity (GO:0052547)	15.98	0.000976	0.0258
fatty acid metabolic process (GO:0006631)	15.73	0.00014	0.00839
anatomical structure formation involved in morphogenesis (GO:0048646)	15.28	0.000156	0.00909
regulation of anatomical structure morphogenesis (GO:0022603)	15.28	0.000156	0.00885
regulation of response to external stimulus (GO:0032101)	13.65	0.00152	0.0362
regulation of proteolysis (GO:0030162)	13.61	0.000239	0.0118
cell junction assembly (GO:0034329)	13.35	0.00161	0.0377
regulation of multicellular organismal development (GO:2000026)	12.86	0.000295	0.0137
taxis (GO:0042330)	12.42	5.76e-05	0.00457
chemotaxis (GO:0006935)	12.42	5.76e-05	0.00441
regulation of protein kinase activity (GO:0045859)	11.79	0.00227	0.0467
regulation of protein phosphorylation (GO:0001932)	11.25	1.71e-05	0.00253
regulation of cell population proliferation (GO:0042127)	10.52	0.000617	0.0208
monocarboxylic acid metabolic process (GO:0032787)	10.52	0.000617	0.0205
cell population proliferation (GO:0008283)	9.42	0.000924	0.0253
regulation of protein modification process (GO:0031399)	9.24	5.02e-05	0.00429
regulation of phosphorylation (GO:0042325)	9.07	5.56e-05	0.00457
regulation of phosphorus metabolic process (GO:0051174)	8.38	8.52e-05	0.00591
regulation of phosphate metabolic process (GO:0019220)	8.38	8.52e-05	0.00573
regulation of cellular protein metabolic process (GO:0032268)	7.96	1.84e-06	0.000453
regulation of protein metabolic process (GO:0051246)	7.55	2.82e-06	0.000625
regulation of developmental process (GO:0050793)	7.4	0.0022	0.0466
cell migration (GO:0016477)	7.18	0.00069	0.0219
response to external stimulus (GO:0009605)	6.19	0.000136	0.00838
localization of cell (GO:0051674)	6.06	0.00145	0.0353
cell motility (GO:0048870)	6.06	0.00145	0.0349
protein phosphorylation (GO:0006468)	5.84	0.000574	0.0206
regulation of catalytic activity (GO:0050790)	4.96	0.000514	0.0207
immune system process (GO:0002376)	4.78	0.000635	0.0207
phosphorylation (GO:0016310)	4.75	0.00164	0.0378
positive regulation of nitrogen compound metabolic process (GO:0051173)	4.47	0.00223	0.0464
positive regulation of biological process (GO:0048518)	4.16	9.26e-06	0.00171
system development (GO:0048731)	4.11	0.000678	0.0218
regulation of molecular function (GO:0065009)	3.95	0.0019	0.0418
positive regulation of cellular process (GO:0048522)	3.94	8.5e-05	0.00609
multicellular organism development (GO:0007275)	3.67	0.0014	0.0346
regulation of nitrogen compound metabolic process (GO:0051171)	3.2	9.23e-06	0.00186
regulation of primary metabolic process (GO:0080090)	3.16	1.1e-05	0.00187
regulation of cellular metabolic process (GO:0031323)	3.05	1.78e-05	0.00247
regulation of macromolecule metabolic process (GO:0060255)	2.97	2.48e-05	0.0029
regulation of metabolic process (GO:0019222)	2.81	4.95e-05	0.00439
regulation of cellular process (GO:0050794)	1.97	0.000944	0.0252
regulation of biological process (GO:0050789)	1.97	0.00061	0.0212
primary metabolic process (GO:0044238)	1.91	0.000521	0.0207
biological regulation (GO:0065007)	1.88	0.000931	0.0252
organic substance metabolic process (GO:0071704)	1.76	0.00223	0.0467
cellular process (GO:0009987)	1.58	0.000104	0.0066
biological_process (GO:0008150)	1.56	3.03e-05	0.00292
Unclassified (UNCLASSIFIED)	0.41	3.03e-05	0.00306
